# Supplementary material
Source: Springer Nature journal article supplement (https://www.springermedizin.de/resource/supplementary/12913_2013_3010_MOESM3_ESM.pdf/9533274)

# Cost Trends with the Protocol

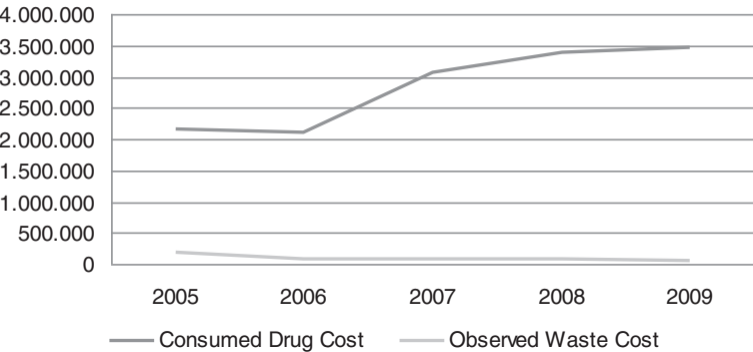

Supplement: MOESM3 [file 9533274]
